# Supplementary material for: Enredo and Pecan: Genome-wide mammalian consistency-based multiple alignment with paralogs
Source: HighWire-hosted journal article supplement (doi:10.1101/gr.076554.108), 2008-10-10
Supplement: supplementary_materal.zip [file ancestral_repeats.pdf › supplementary_materal/ancestral_repeats.pdf]

# Accurate genome wide multiple alignments and reconstruction in mammal

Downloads of the programs and the entire dataset are available at <http://www.ebi.ac.uk/~jherrero/docs/epo/>

## *Ancestral repeat analysis*

### List of Ancestral repeats

We choosed the ancestral repeats using the following criteria:

- they were Type II transposons
- they were present between 300 and 50000 times in every genome
- the number of repeats for each species fell within the ratio:
  - mouse/human between 0.2 and 0.7
  - rat/human between 0.2 and 0.7
  - dog/human between 0.2 and 1.0
  - cow/human between 0.2 and 1.0

Supplementary Table 1: List of ancestral repeats. A table showing the list of Ancestral Repeats used in the assessment of the alignments as well as the number of times we find each repeat in each genome

| Ancestral repeat | Presence in each genome |       |      |       |       |
|------------------|-------------------------|-------|------|-------|-------|
|                  | Human                   | Mouse | Rat  | Dog   | Cow   |
| Charlie1         | 6148                    | 3494  | 2618 | 5171  | 5815  |
| Charlie4         | 1630                    | 775   | 557  | 1239  | 1543  |
| Cheshire         | 880                     | 456   | 393  | 654   | 670   |
| MER5A            | 40768                   | 12528 | 9027 | 30932 | 34870 |
| MER20            | 18777                   | 6358  | 4484 | 14297 | 16808 |
| MER45B           | 1314                    | 699   | 446  | 1050  | 1130  |
| MER58B           | 7864                    | 2879  | 2034 | 6251  | 7209  |
| MER82            | 3634                    | 1917  | 1342 | 2853  | 3176  |
| MER119           | 1333                    | 441   | 321  | 1060  | 1165  |

### Ancestral repeat correspondence

We found that some of these repeats were aligned to homologous ancestral repeats in the other species. In order to improve the coverage of our analysis, we compared and aligned the consensus sequence of the ancestral repeats in order to build the following correspondence table.

Some of these cases correspond to perfect matches between these regions while in other cases we used exonerate (Slater and Birney, BMC Bioinformatics 2005, 6:31) to align and match the positions from one ancestral repeat to the other.

Supplementary Table 2: Correspondence between ancestral repeats.

| Correspondence between ancestral repeats |             |                          |            |
|------------------------------------------|-------------|--------------------------|------------|
| Ancestral repeat                         | Region      | Aligned ancestral repeat | Region     |
| Charlie1                                 | 1 – 115     | Charlie1a                | 1 – 115    |
|                                          | 1427 – 2761 |                          | 121 – 1455 |
|                                          | 1 – 171     | Charlie1b                | 1 – 171    |
|                                          | 2416 – 2761 |                          | 178 – 523  |
| Charlie4                                 | 1 – 289     | Charlie4a                | 1 – 289    |
|                                          | 1745 – 1961 |                          | 292 – 508  |
| Cheshire                                 | 1 – 2420    | MER58                    | 1 – 2420   |
| MER5A                                    | 36 – 189    | MER58A                   | 25 – 178   |
| MER45B                                   | 1 – 1040    | MER45                    | 1 – 1040   |
| MER58B                                   | 1 – 341     | MER58                    | 1 – 341    |
|                                          | 1 – 46      | MER58A                   | 1 – 46     |
|                                          | 175 – 341   |                          | 58 – 224   |

## Results by ancestral repeat

The following tables contain the details of the ancestral repeat assessment for each ancestral repeat

Supplementary Table 3: Ancestral repeat assessment for Charlie1 repeats

| Charlie1        |               |                 |            |              |                 |            |
|-----------------|---------------|-----------------|------------|--------------|-----------------|------------|
| Alignment       | Results in bp |                 |            | Results as % |                 |            |
|                 | Full matches  | Partial matches | Mismatches | Full matches | Partial matches | Mismatches |
| Mercator+Mlagan | 194522        | 124936          | 282737     | 32.3         | 20.75           | 46.95      |
| Mercator+Pecan  | 318892        | 145283          | 209119     | 47.36        | 21.58           | 31.06      |
| MutliZ          | 330213        | 283135          | 239281     | 38.73        | 33.21           | 28.06      |
| Enredo+Pecan    | 463561        | 174291          | 266404     | 51.26        | 19.27           | 29.46      |

Supplementary Table 4: Ancestral repeat assessment for Charlie4 repeats

| Charlie4        |               |                 |            |              |                 |            |
|-----------------|---------------|-----------------|------------|--------------|-----------------|------------|
| Alignment       | Results in bp |                 |            | Results as % |                 |            |
|                 | Full matches  | Partial matches | Mismatches | Full matches | Partial matches | Mismatches |
| Mercator+Mlagan | 22003         | 23202           | 35384      | 27.3         | 28.79           | 43.91      |
| Mercator+Pecan  | 33178         | 28465           | 26220      | 37.76        | 32.4            | 29.84      |
| MutliZ          | 40109         | 50692           | 30452      | 33.08        | 41.81           | 25.11      |
| Enredo+Pecan    | 49550         | 40071           | 33656      | 40.19        | 32.5            | 27.3       |

Supplementary Table 5: Ancestral repeat assessment for Cheshire repeats

| Cheshire        |               |                 |            |              |                 |            |
|-----------------|---------------|-----------------|------------|--------------|-----------------|------------|
| Alignment       | Results in bp |                 |            | Results as % |                 |            |
|                 | Full matches  | Partial matches | Mismatches | Full matches | Partial matches | Mismatches |
| Mercator+Mlagan | 60198         | 26616           | 67261      | 39.07        | 17.27           | 43.65      |
| Mercator+Pecan  | 91762         | 29785           | 47492      | 54.28        | 17.62           | 28.1       |
| MutliZ          | 83158         | 62799           | 50070      | 42.42        | 32.04           | 25.54      |
| Enredo+Pecan    | 132022        | 31994           | 57126      | 59.7         | 14.47           | 25.83      |

Supplementary Table 6: Ancestral repeat assessment for MER5A repeats

| MER5A           |               |                 |            |              |                 |            |
|-----------------|---------------|-----------------|------------|--------------|-----------------|------------|
| Alignment       | Results in bp |                 |            | Results as % |                 |            |
|                 | Full matches  | Partial matches | Mismatches | Full matches | Partial matches | Mismatches |
| Mercator+Mlagan | 465640        | 585880          | 719547     | 26.29        | 33.08           | 40.63      |
| Mercator+Pecan  | 684916        | 649317          | 540847     | 36.53        | 34.63           | 28.84      |
| MutliZ          | 960529        | 1296187         | 913138     | 30.3         | 40.89           | 28.81      |
| Enredo+Pecan    | 1127082       | 934530          | 800396     | 39.38        | 32.65           | 27.97      |

Supplementary Table 7: Ancestral repeat assessment for MER20 repeats

| MER20           |               |                 |            |              |                 |            |
|-----------------|---------------|-----------------|------------|--------------|-----------------|------------|
| Alignment       | Results in bp |                 |            | Results as % |                 |            |
|                 | Full matches  | Partial matches | Mismatches | Full matches | Partial matches | Mismatches |
| Mercator+Mlagan | 401733        | 385751          | 537773     | 30.31        | 29.11           | 40.58      |
| Mercator+Pecan  | 603321        | 440762          | 363789     | 42.85        | 31.31           | 25.84      |
| MutliZ          | 779070        | 920097          | 573600     | 34.28        | 40.48           | 25.24      |
| Enredo+Pecan    | 946760        | 607954          | 513671     | 45.77        | 29.39           | 24.83      |

Supplementary Table 8: Ancestral repeat assessment for MER45B repeats

| MER45B          |               |                 |            |              |                 |            |
|-----------------|---------------|-----------------|------------|--------------|-----------------|------------|
| Alignment       | Results in bp |                 |            | Results as % |                 |            |
|                 | Full matches  | Partial matches | Mismatches | Full matches | Partial matches | Mismatches |
| Mercator+Mlagan | 50040         | 26042           | 62612      | 36.08        | 18.78           | 45.14      |
| Mercator+Pecan  | 78959         | 31411           | 43186      | 51.42        | 20.46           | 28.12      |
| MutliZ          | 126009        | 116976          | 89031      | 37.95        | 35.23           | 26.82      |
| Enredo+Pecan    | 169425        | 58071           | 77956      | 55.47        | 19.01           | 25.52      |

Supplementary Table 9: Ancestral repeat assessment for MER58B repeats

| MER58B          |               |                 |            |              |                 |            |
|-----------------|---------------|-----------------|------------|--------------|-----------------|------------|
| Alignment       | Results in bp |                 |            | Results as % |                 |            |
|                 | Full matches  | Partial matches | Mismatches | Full matches | Partial matches | Mismatches |
| Mercator+Mlagan | 205013        | 182741          | 275037     | 30.93        | 27.57           | 41.5       |
| Mercator+Pecan  | 311873        | 206620          | 189539     | 44.05        | 29.18           | 26.77      |
| MutliZ          | 388237        | 445354          | 262720     | 35.41        | 40.62           | 23.96      |
| Enredo+Pecan    | 475853        | 279305          | 258506     | 46.94        | 27.55           | 25.5       |

Supplementary Table 10: Ancestral repeat assessment for MER82 repeats

| MER82           |               |                 |            |              |                 |            |
|-----------------|---------------|-----------------|------------|--------------|-----------------|------------|
| Alignment       | Results in bp |                 |            | Results as % |                 |            |
|                 | Full matches  | Partial matches | Mismatches | Full matches | Partial matches | Mismatches |
| Mercator+Mlagan | 173645        | 92531           | 188157     | 38.22        | 20.37           | 41.41      |
| Mercator+Pecan  | 276265        | 99976           | 114748     | 56.27        | 20.36           | 23.37      |
| MutliZ          | 345461        | 281915          | 184235     | 42.56        | 34.74           | 22.7       |
| Enredo+Pecan    | 451728        | 137978          | 159015     | 60.33        | 18.43           | 21.24      |

Supplementary Table 11: Ancestral repeat assessment for MER119 repeats

| MER119          |               |                 |            |              |                 |            |
|-----------------|---------------|-----------------|------------|--------------|-----------------|------------|
| Alignment       | Results in bp |                 |            | Results as % |                 |            |
|                 | Full matches  | Partial matches | Mismatches | Full matches | Partial matches | Mismatches |
| Mercator+Mlagan | 42513         | 38200           | 58790      | 30.47        | 27.38           | 42.14      |
| Mercator+Pecan  | 64767         | 44812           | 40368      | 43.19        | 29.89           | 26.92      |
| MutliZ          | 83597         | 94099           | 61485      | 34.95        | 39.34           | 25.71      |
| Enredo+Pecan    | 105718        | 62119           | 57879      | 46.84        | 27.52           | 25.64      |
